# Supplementary material for: Tracing water masses with 129 I and 236 U in the subpolar North Atlantic along the GEOTRACES GA01 section
Source: Copernicus journal article supplement (doi:10.5194/bg-15-5545-2018), 2018-09-18
Supplement: Supplementary file 1 [file bg-15-5545-2018-supplement.zip]

Archive with 3 entries (3 files):
- Castrillejo et al_supplementary data on uranium isotopes.xlsx
- bg-15-5545-2018-supplement-title-page.pdf
- Supplemental Castrillejo et al_U-236 and I-129 along GA01 GEOTRACES_FINA....pdf
