# Supplementary material for: Tracing water masses with 129 I and 236 U in the subpolar North Atlantic along the GEOTRACES GA01 section
Source: Copernicus journal article supplement (doi:10.5194/bg-15-5545-2018), 2018-09-18
Supplement: Supplementary file 1 [file bg-15-5545-2018-supplement.zip › bg-15-5545-2018-supplement-title-page.pdf]

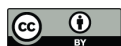

## *Supplement of*

# **Tracing water masses with $^{129}\text{I}$ and $^{236}\text{U}$ in the subpolar North Atlantic along the GEOTRACES GA01 section**

**Maxi Castrillejo et al.**

*Correspondence to:* Maxi Castrillejo (maxic@phys.ethz.ch)

- bg-15-5545-2018-supplement-title-page.pdf
- Castrillejo et al\_supplementary data on uranium isotopes.xlsx
- Supplemental Castrillejo et al\_U-236 and I-129 along GA01 GEOTRACES\_FINA....pdf

The copyright of individual parts of the supplement might differ from the CC BY 4.0 License.
