# Supplementary material for: Tracing water masses with 129 I and 236 U in the subpolar North Atlantic along the GEOTRACES GA01 section
Source: Copernicus journal article supplement (doi:10.5194/bg-15-5545-2018), 2018-09-18
Supplement: Supplementary file 1 [file bg-15-5545-2018-supplement.zip › Castrillejo et al_supplementary data on uranium isotopes.xlsx]

## Sheet: Sheet1
	236U conc.		238U conc.		236U/238U (at/at)
ETH-code	(106 at/kg)	uncert.	(ug/kg)	uncert.	(10-12)	uncert.
TU1123	7.85892	0.387214	3.30249	0.0912343	940.496	53.1258
TU1124	2.53845	0.558843	2.97801	0.741196	336.882	111.94
TU1125	2.30408	0.281316	3.35013	0.116164	271.814	34.4994
TU1126	4.42265	0.309652	3.24528	0.102039	538.602	41.3382
TU1127	6.27195	0.286745	3.42618	0.0538519	723.484	34.9768
TU1129	1.19244	0.203971	3.43734	0.0539369	137.104	23.5506
TU1130	0.328219	0.195344	3.53067	0.0549777	36.7403	21.874
TU1131	0.030763	0.195881	3.45165	0.0575464	3.5224	22.4287
TU1132	0.00797198	0.206796	3.42146	0.0582244	0.920854	23.8873
TU1133	0.635419	0.201896	3.36929	0.0587427	74.5346	23.718
TU1134	8.26643	0.399851	3.25619	0.0883766	1003.33	55.6496
TU1135	8.39577	0.413187	3.35855	0.0925903	987.973	55.7309
TU1136	9.96664	0.56726	3.90267	0.0872343	1009.31	61.7168
TU1137	8.68836	0.330169	3.54694	0.0554941	968.1	39.7851
TU1138	7.86516	0.341158	3.33994	0.0551918	930.689	43.1997
TU1139	0.63586	0.195649	3.32223	0.0583777	75.6427	23.3126
TU1141	9.17601	0.421962	3.20022	0.0805315	1133.21	59.4033
TU1147	8.58783	0.498889	3.28722	0.105361	1032.5	68.5046
TU1148	9.32617	0.404604	3.17614	0.0476422	1160.48	53.2705
TU1149	8.34648	0.329766	3.35607	0.050341	982.9	41.5385
TU1150	6.44113	0.329966	3.25833	0.0488749	781.274	41.7035
TU1151	10.6226	0.762297	3.15227	0.0705225	1331.81	100.11
TU1152	9.19046	0.455639	3.27174	0.0708767	1110.18	60.0651
TU1153	8.41277	0.37606	3.0265	0.0494337	1098.59	52.2837
TU1154	8.86779	0.464799	3.34007	0.0546863	1049.29	57.6185
TU1155	8.5246	0.367592	3.54067	0.0531101	951.534	43.443
TU1156	8.6176	0.331935	3.49401	0.0524101	974.762	40.2927
TU1158	8.79099	0.379227	3.45025	0.0517537	1006.99	45.9907
TU1159	8.76	0.34572	3.35641	0.0503461	1031.49	43.5498
TU1160	8.77433	0.345957	3.36436	0.0504653	1030.74	43.4819
TU1161	8.54298	0.352807	3.40823	0.0511235	990.642	43.5264
TU1162	8.57853	0.515825	3.41262	0.0521155	993.484	61.6344
TU1163	8.45632	0.385229	3.44241	0.0516362	970.855	46.5633
TU1164	8.4738	0.405711	3.40311	0.058629	984.098	50.0743
TU1165	8.08541	0.343158	3.39259	0.0508889	941.904	42.3992
TU1166	8.41889	0.352224	3.45607	0.051841	962.74	42.789
TU1167	8.56893	0.366024	3.4665	0.0529165	976.948	44.3153
TU1168	7.9346	0.450079	3.24567	0.0747696	966.176	59.1523
TU1170	9.14837	0.500801	3.4162	0.051243	1058.37	60.073
TU1171	7.86137	0.382998	3.36705	0.0505058	922.751	47.038
TU1172	8.84779	0.378915	3.49175	0.0523762	1001.45	45.4426
TU1173	8.20752	0.481263	3.40965	0.0511448	951.345	57.5801
TU1174	8.1482	0.46901	3.31268	0.0496902	972.117	57.8237
TU1175	8.02762	0.355886	3.27078	0.0490617	970	45.3976
TU1176	9.14922	0.395931	3.29538	0.0494307	1097.27	50.2559
TU1177	8.76151	0.389312	3.35682	0.0503523	1031.54	48.3771
TU1178	8.0674	0.33645	3.31523	0.0497285	961.736	42.6246
TU1179	7.9581	0.382605	3.42272	0.0513407	918.914	46.2793
TU1180	7.00685	0.310431	3.365	0.050475	822.95	38.493
TU1183	8.24167	0.426751	3.19464	0.0479197	1019.6	54.9651
TU1184	7.76798	0.37214	3.43862	0.0515792	892.813	44.8196
TU1185	9.17302	0.368239	3.39005	0.0508508	1069.4	45.8289
TU1186	9.45443	0.291079	3.49182	0.0523773	1070.09	36.6476
TU1188	8.27925	0.435474	3.38395	0.0507593	966.948	52.8874
TU1189	8.67092	0.436216	3.3274	0.0499111	1029.9	54.0663
TU1190	9.84993	0.34899	3.32441	0.0498662	1170.99	45.0541
TU1191	8.59423	0.303421	3.37784	0.0506676	1005.55	38.5725
TU1192	8.32732	0.48966	3.23416	0.0485124	1017.61	61.7532
TU1193	8.79761	0.345181	3.45531	0.0518296	1006.27	42.2686
TU1194	8.88539	0.35408	3.41851	0.0512777	1027.25	43.7395
TU1195	9.89769	0.394305	3.34936	0.0502404	1167.91	49.716
TU1196	9.20331	0.328263	3.32966	0.0499449	1092.4	42.2688
TU1197	8.64173	0.290417	3.31822	0.0497733	1029.28	37.8794
TU1198	8.87292	0.308849	3.42531	0.0513797	1023.77	38.8034
TU1200	8.13649	0.275663	3.39252	0.0508878	947.875	35.1205
TU1201	8.98169	0.239796	3.34291	0.0501436	1061.87	32.5181
TU1202	9.70544	0.258125	3.39479	0.0509219	1129.9	34.5005
TU1203	8.72465	0.322571	3.40613	0.051092	1012.33	40.3914
TU1204	8.99428	0.236974	3.42735	0.0514103	1037.16	31.4444
TU1205	8.0888	0.292414	3.41326	0.0511989	936.594	36.6572
TU1206	9.30572	0.359407	3.45559	0.0518338	1064.3	44.0969
TU1207	9.20074	0.28495	3.48957	0.0523435	1042.05	35.8585
TU1208	8.32518	0.279381	3.35658	0.0503487	980.242	36.032
TU1209	9.31429	0.320412	3.5118	0.052677	1048.23	39.3381
TU1210	9.61764	0.228595	3.55621	0.0533432	1068.85	30.0408
TU1212	7.36339	0.638265	3.34704	0.0834945	869.467	78.4251
TU1213	9.32143	0.338832	3.35607	0.0503411	1097.71	43.1654
TU1214	8.88069	0.204541	3.37525	0.0506287	1039.87	28.5817
TU1215	9.5262	0.417222	3.29294	0.0493941	1143.33	52.9303
TU1216	9.34112	0.287701	3.29949	0.0494923	1118.89	38.3309
TU1217	9.41762	0.345968	3.33209	0.0499813	1117.02	44.3241
TU1218	9.18865	0.3281	3.34592	0.0501888	1085.36	42.0356
TU1219	9.07612	0.261238	3.36732	0.0505098	1065.25	34.5749
TU1220	9.85055	0.259587	3.45808	0.0518712	1125.8	34.1371
TU1221	9.64797	0.658743	3.29774	0.0526449	1156.26	81.0763
TU1222	9.83589	0.293752	3.43837	0.0515755	1130.57	37.7844
TU1224	8.85976	0.370649	3.38527	0.0507791	1034.34	45.9692
TU1225	12.6892	1.59648	3.14224	0.0969363	1596	206.747
TU1226	11.4806	1.17488	3.31711	0.0795691	1367.86	143.776
TU1227	11.2451	1.33581	3.01004	0.095115	1476.47	181.491
TU1228	10.9956	1.25556	3.34826	0.0797101	1297.89	151.388
TU1229	9.54	0.943871	3.12071	0.0738965	1208.18	122.911
TU1230	11.3426	1.06393	3.23125	0.0854898	1387.32	135.208
TU1231	8.85545	1.14748	3.23679	0.079419	1081.27	142.599
TU1232	7.90545	0.827496	3.21734	0.0673456	971.102	103.662
TU1233	8.92533	0.86372	3.30371	0.0710508	1067.72	105.846
TU1234	9.49758	0.853189	3.32359	0.0732524	1129.38	104.464
TU1236	8.58416	1.23513	3.20371	0.0924651	1058.96	155.404
TU1238	8.81644	0.962843	3.25593	0.0771165	1070.17	119.591
TU1240	9.29551	1.59745	3.39321	0.116776	1082.68	189.755
TU1242	9.00646	1.42171	3.23041	0.0946092	1101.88	176.905
TU1243	8.71589	0.934825	3.19006	0.0756565	1079.82	118.614
TU1245	8.48646	1.33591	3.24155	0.0971909	1034.69	165.806
TU1246	8.52724	1.349	3.23619	0.101701	1041.38	167.965
TU1248	9.66365	1.01092	3.2493	0.0775784	1175.4	126.122
TU1249	9.45506	0.905241	3.22586	0.0715561	1158.39	113.844
TU1251	14.7262	2.26573	3.28233	0.0492349	1773.15	274.105
TU1252	8.38592	2.51425	3.21229	0.0481843	1031.74	309.722
TU1254	8.52941	2.81236	3.1718	0.047577	1062.79	350.792
TU1255	19.0902	2.86324	3.38351	0.0507527	2229.87	336.115
TU1256	15.6988	3.67496	2.9405	0.0441074	2110	494.946
TU1257	18.9309	2.93492	3.18335	0.0477502	2350.3	366.076
TU1258	11.167	2.23	3.19452	0.0479178	1381.55	276.666
TU1260	8.62276	2.75446	3.27195	0.0490792	1041.54	333.077
TU1261	9.03535	3.46894	3.28387	0.0511307	1087.41	417.834
TU1262	10.715	2.56342	3.3102	0.0496531	1279.31	306.658
TU1263	15.1691	2.64858	3.09221	0.0463832	1938.78	339.763
TU1264	5.37286	2.70147	3.30411	0.0518698	642.669	323.291
TU1265	16.1515	2.42746	3.11209	0.0466813	2051.15	309.806
TU1267	11.8895	3.82948	3.00226	0.0475709	1565.13	504.722
TU1270	11.9766	3.48181	3.08956	0.0470542
TU1272	6.8745	2.43827	3.32904	0.0499356	816.129	289.725
TU1274	5.13346	2.44827	3.25027	0.0504051	624.204	297.855
TU1275	7.66727	2.66871	3.22556	0.0483835	939.445	327.292
TU1277	10.2321	0.500569	3.30881	0.0757814	1222.17	66.0177
TU1278	15.732	0.929904	2.97465	0.0816938	2090.18	136.233
TU1279	10.4287	0.379468	3.35891	0.0769773	1227.06	52.7669
TU1280	10.3501	0.391928	3.38289	0.0724207	1209.18	52.5989
TU1281	10.3259	0.416569	3.43655	0.0726587	1187.52	54.0877
TU1282	9.78695	0.517543	3.40583	0.0756639	1135.69	65.1412
TU1284	10.595	0.340154	3.37788	0.0749534	1239.64	48.3792
TU1285	10.5678	0.345782	3.2893	0.075296	1269.75	50.7045
TU1286	12.0584	0.579459	3.4067	0.0742169	1398.92	73.8098
TU1287	11.1512	0.46647	3.25429	0.087696	1354.25	67.3877
