# Supplementary material for: Tracing water masses with 129 I and 236 U in the subpolar North Atlantic along the GEOTRACES GA01 section
Source: Copernicus journal article supplement (doi:10.5194/bg-15-5545-2018), 2018-09-18

*Supplemental Information for*

**Tracing water masses with  $^{129}\text{I}$  and  $^{236}\text{U}$  in the subpolar North Atlantic along the GEOTRACES GA01 section**

Castrillejo et al.,

*Correspondence to:* Maxi Castrillejo (maxic@phys.ethz.ch)

**S1. Depth profiles of  $^{129}\text{I}$  concentrations,  $^{236}\text{U}/^{238}\text{U}$  atom ratios, potential temperature, salinity and dissolved oxygen concentration obtained during the GEOVIDE cruise in spring 2014. Water mass acronyms in Table 1 of the main text.**

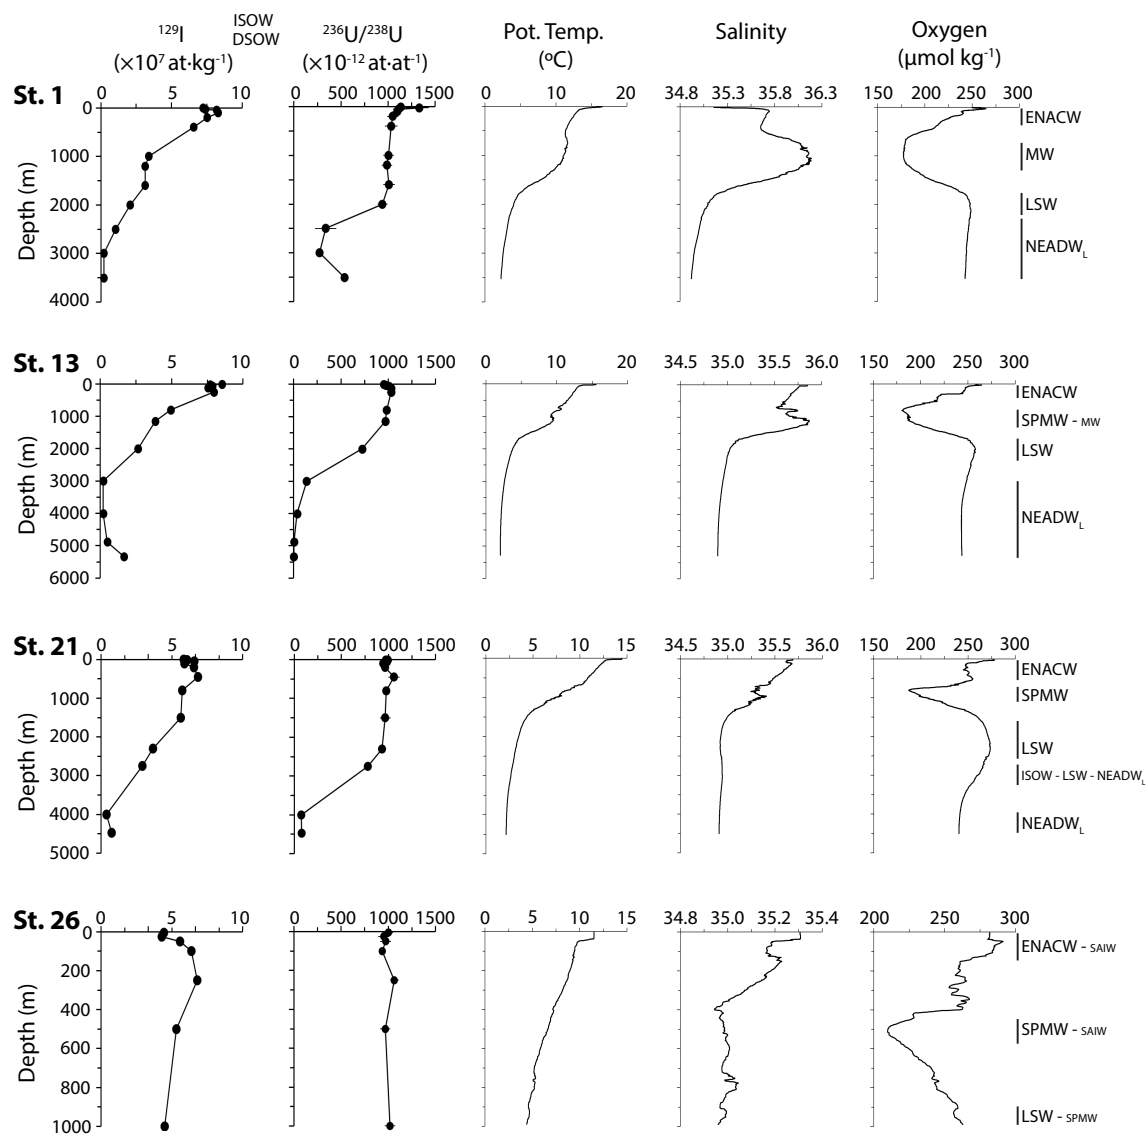

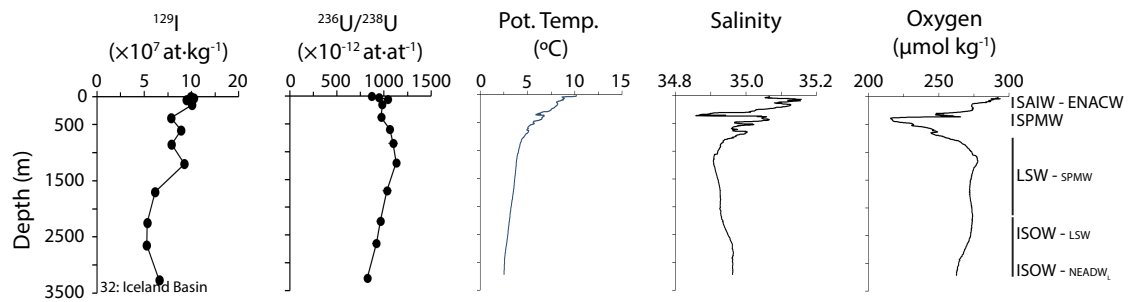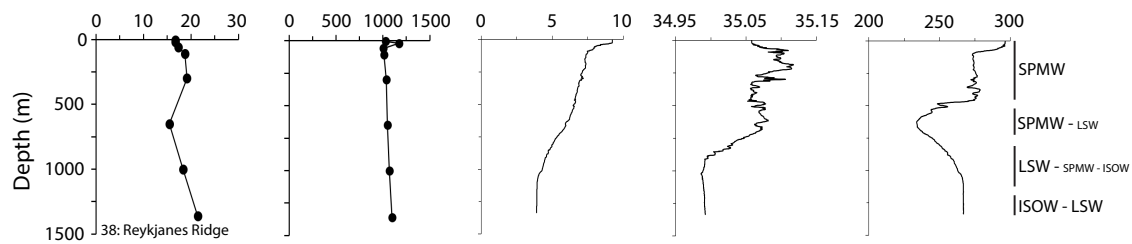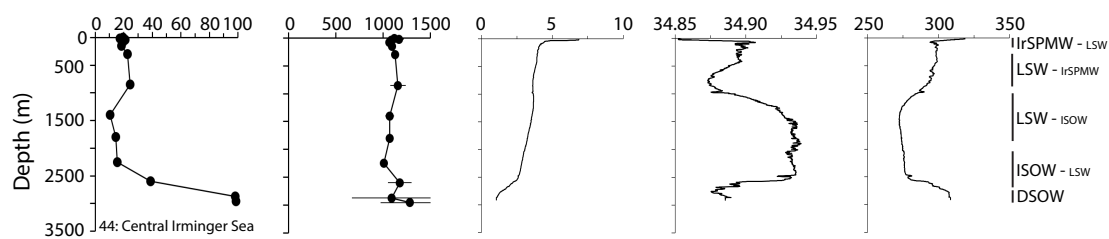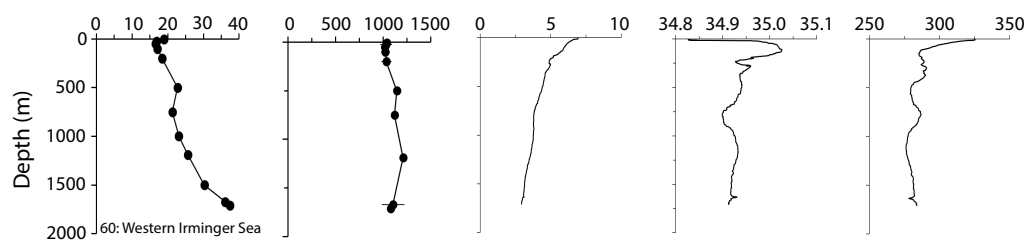

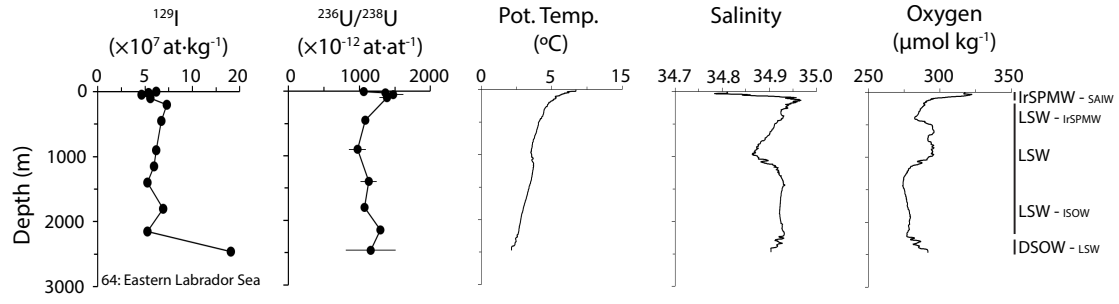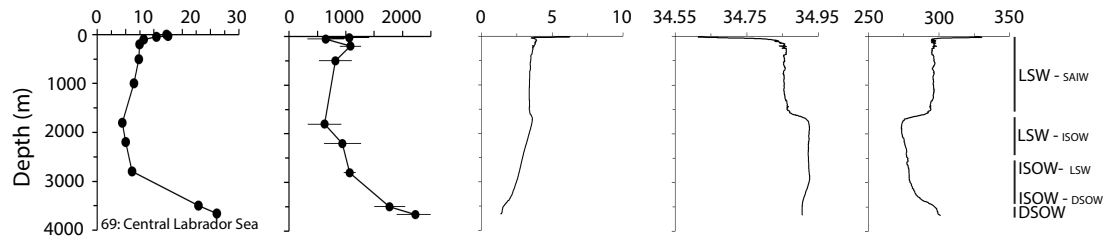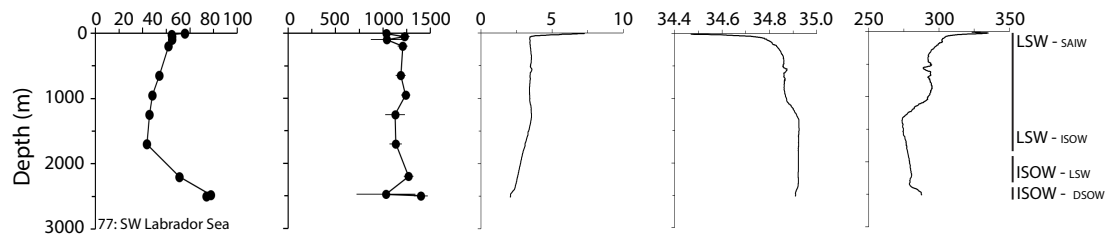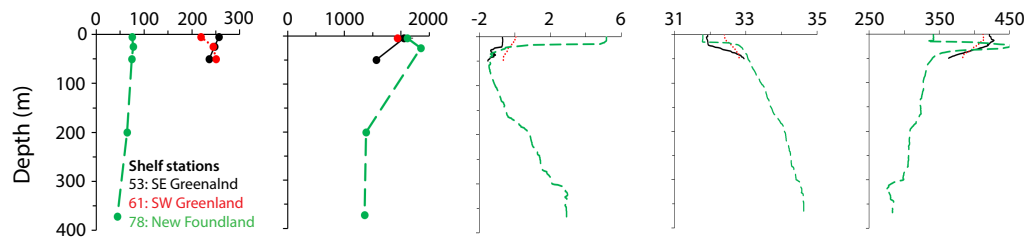

S2. Concentrations of  $^{129}\text{I}$  in surface seawater for (a) 1993 (Edmonds et al., 2001), (b) 1999 (Alfimov et al., 2004a), (c) 2010 (Gómez-guzmán et al., 2013), (d) 2012 (Vivo-Vilches et al., 2018), (e) 2010 (He et al., 2013b) and (f) 2014 (this work). SAF: Subarctic front. Raw figures were created using Ocean Data View.

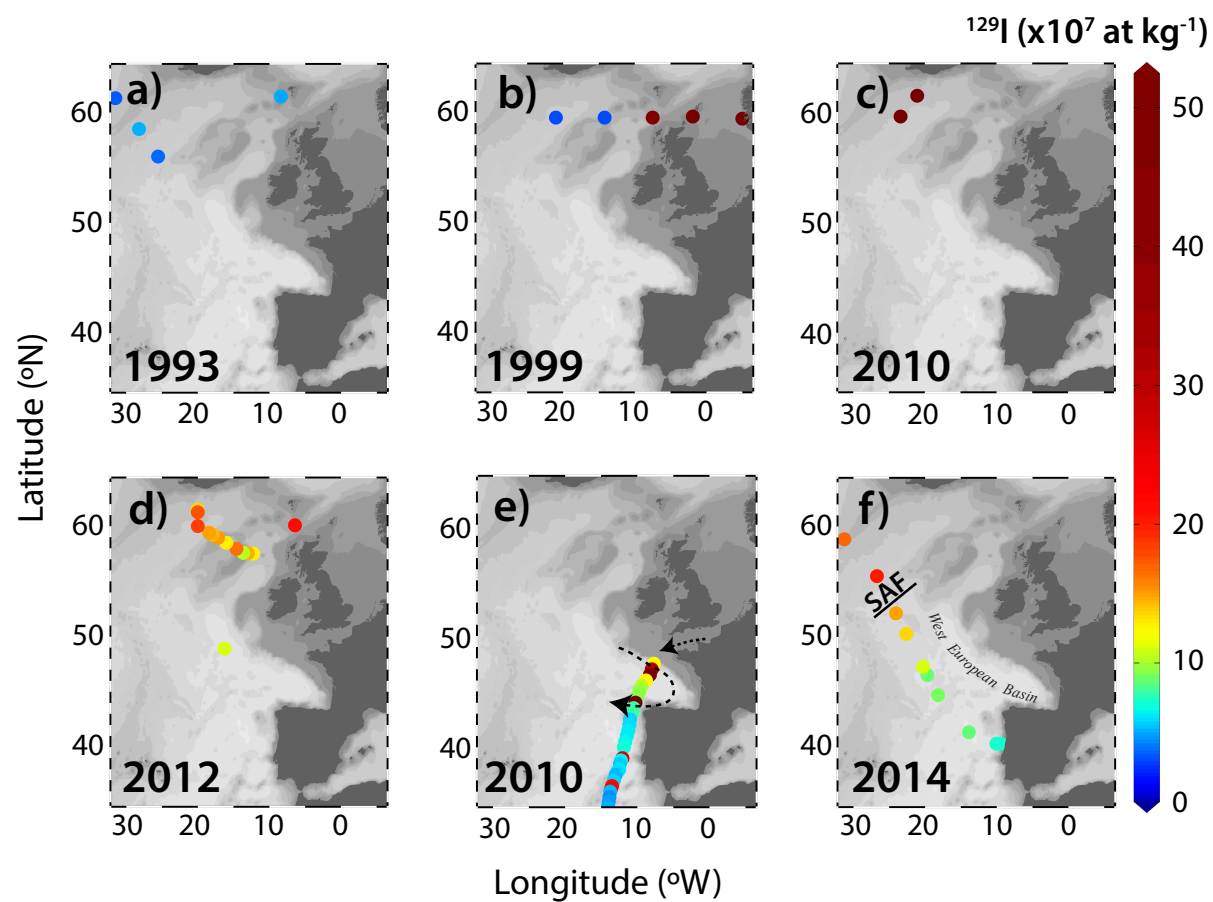

Supplement: Supplementary file 1 [file bg-15-5545-2018-supplement.zip › Supplemental Castrillejo et al_U-236 and I-129 along GA01 GEOTRACES_FINA....pdf]
